# Supplementary material for: Effect of ion to ligand ratio on the aqueous to organic relative solubility of a lanthanide–ligand complex
Source: Royal Society of Chemistry journal article supplement (doi:10.1039/d4cp02586e), 2024-01-01
Supplement: d4cp02586e1.pdf [file d4cp02586e1.pdf]

## Supplementary Information

### Effect of Ion to Ligand Ratio on the Aqueous to Organic Relative Solubility of a Lanthanide-Ligand Complex

Thomas J. Summers,<sup>1,#</sup> Jesus Diaz Sanchez,<sup>1</sup> David C. Cantu<sup>1,\*</sup>

<sup>1</sup>*Department of Chemical and Materials Engineering, University of Nevada, Reno, Reno, NV,  
USA*

\*Corresponding author: [dcantu@unr.edu](mailto:dcantu@unr.edu)

<sup>#</sup>Present address: Los Alamos National Laboratory, Los Alamos, NM, USA

**Table S1.** Details on model construction.

| <b>Exchanged Molecule</b> | <b>Water Molecule Count</b> | <b>Organic Molecule Count</b> | <b>Additional Components</b> | <b>Equilibrated Box Dimensions (nm)</b>  |
|---------------------------|-----------------------------|-------------------------------|------------------------------|------------------------------------------|
| Ethylbenzene              | 3500                        | 500 octanol                   | --                           | $4.17752 \times 4.17752 \times 13.61871$ |
|                           | 3500                        | 500 hexane                    | --                           | $4.07038 \times 4.07038 \times 13.02523$ |
| Formamide                 | 3500                        | 500 octanol                   | --                           | $4.17803 \times 4.17803 \times 13.62040$ |
|                           | 3500                        | 500 hexane                    | --                           | $4.07259 \times 4.07259 \times 13.03228$ |
| Acetonitrile              | 3500                        | 500 octanol                   | --                           | $4.17581 \times 4.17581 \times 13.61316$ |
|                           | 3500                        | 500 hexane                    | --                           | $4.08276 \times 4.08276 \times 13.06482$ |
| Gd <sup>3+</sup>          | 3500                        | 500 octanol                   | 3 Cl <sup>-</sup>            | $4.17535 \times 4.17535 \times 13.61165$ |
|                           | 3500                        | 500 hexane                    | 3 Cl <sup>-</sup>            | $4.44776 \times 4.44776 \times 10.94147$ |
| HDEHP                     | 4000                        | 500 octanol                   | 1 Na <sup>+</sup>            | $4.25623 \times 4.25623 \times 14.00299$ |
|                           | 4000                        | 500 hexane                    | 1 Na <sup>+</sup>            | $4.13736 \times 4.13736 \times 13.61191$ |
| Gd(HDEHP)                 | 4000                        | 500 octanol                   | 2 Cl <sup>-</sup>            | $4.24756 \times 4.24756 \times 13.97450$ |
|                           | 4000                        | 500 hexane                    | 2 Cl <sup>-</sup>            | $4.14806 \times 4.14806 \times 13.64711$ |
| Gd(HDEHP) <sub>2</sub>    | 4850                        | 575 octanol                   | 1 Cl <sup>-</sup>            | $4.39440 \times 4.29440 \times 15.38038$ |
|                           | 4850                        | 775 hexane                    | 1 Cl <sup>-</sup>            | $4.50606 \times 4.50606 \times 15.77123$ |
| Gd(HDEHP) <sub>3</sub>    | 4850                        | 575 octanol                   | --                           | $4.40599 \times 4.40599 \times 15.42095$ |
|                           | 4850                        | 775 hexane                    | --                           | $4.50933 \times 4.50933 \times 15.78266$ |

DEHP<sup>-</sup> gromacs topology file appears at the end of the SI

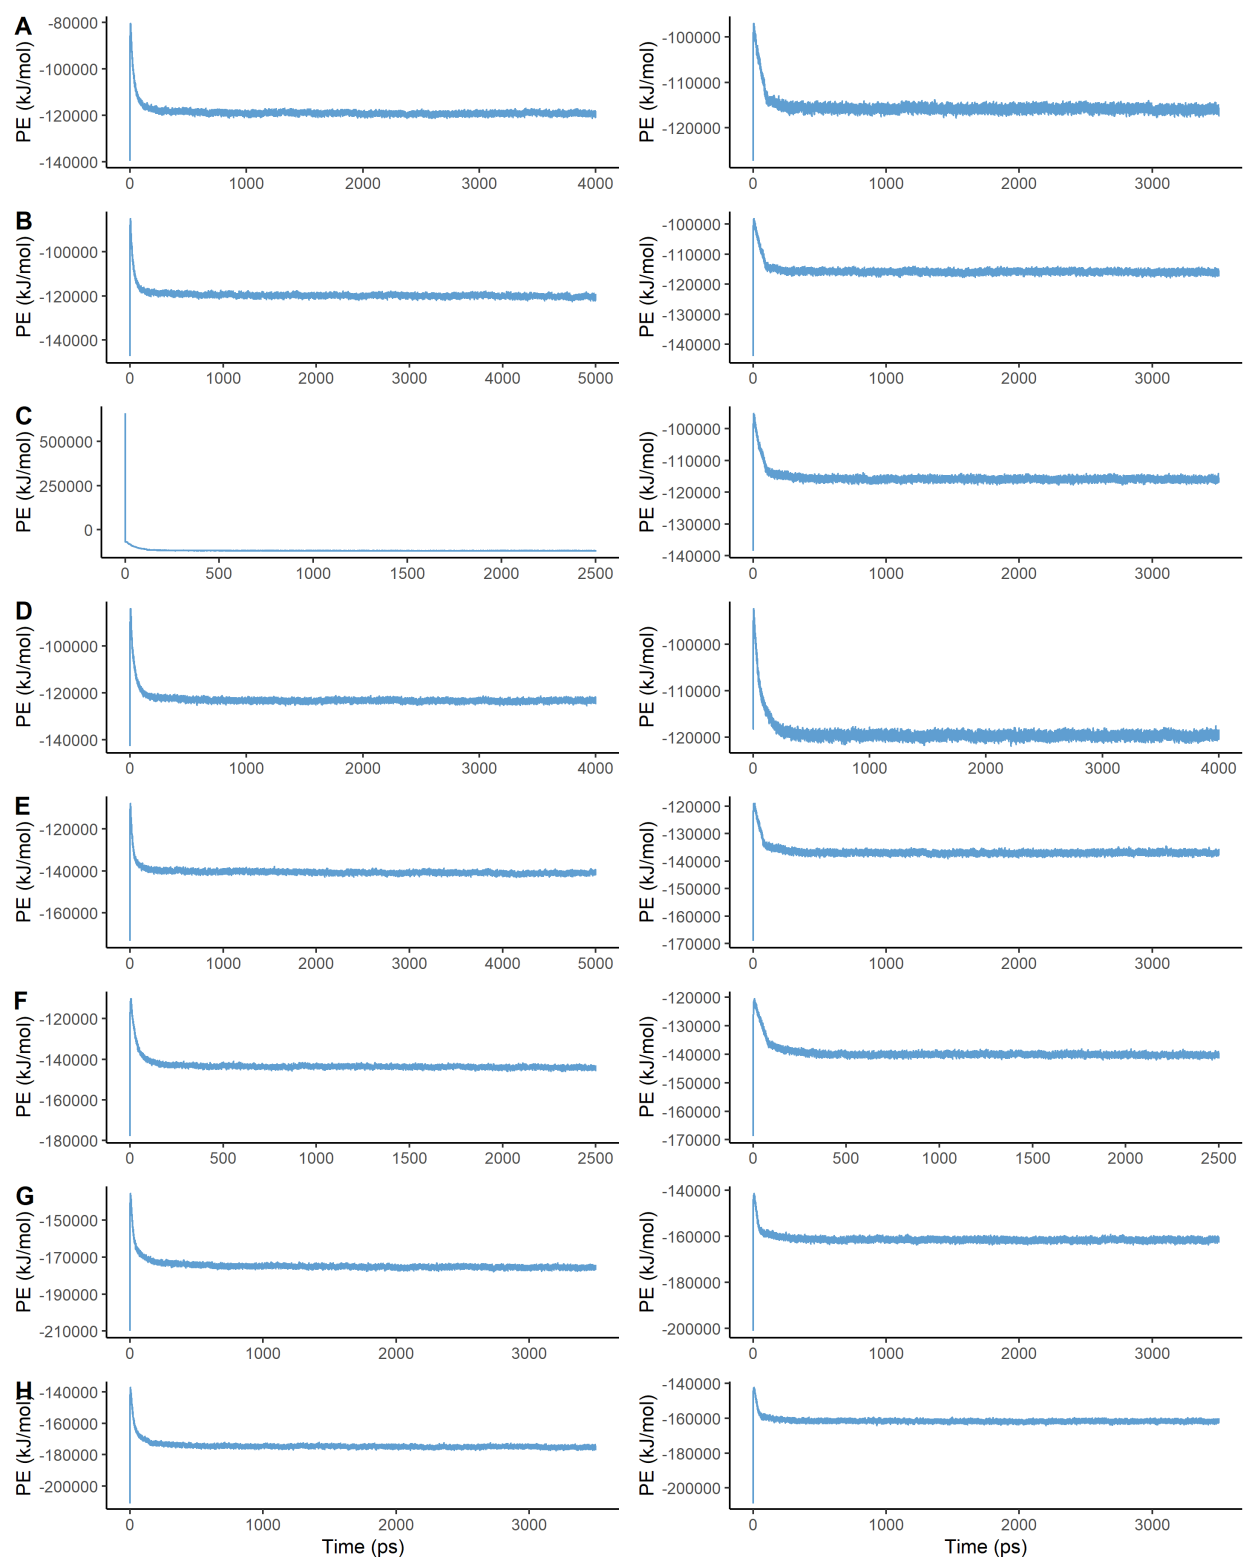

**Figure S1.** Plots of the potential energy (PE) of the biphasic system equilibrations of water and either octanol (left column) or hexane (right column) for the simulations of (A) ethylbenzene, (B) formamide, (C) acetonitrile, (D)  $\text{Gd}^{3+}$  ion, (E)  $\text{DEHP}^-$  ion, (F) Gd-DEHP 1:1, (G) Gd-DEHP 1:2, and (H) Gd-DEHP 1:3.

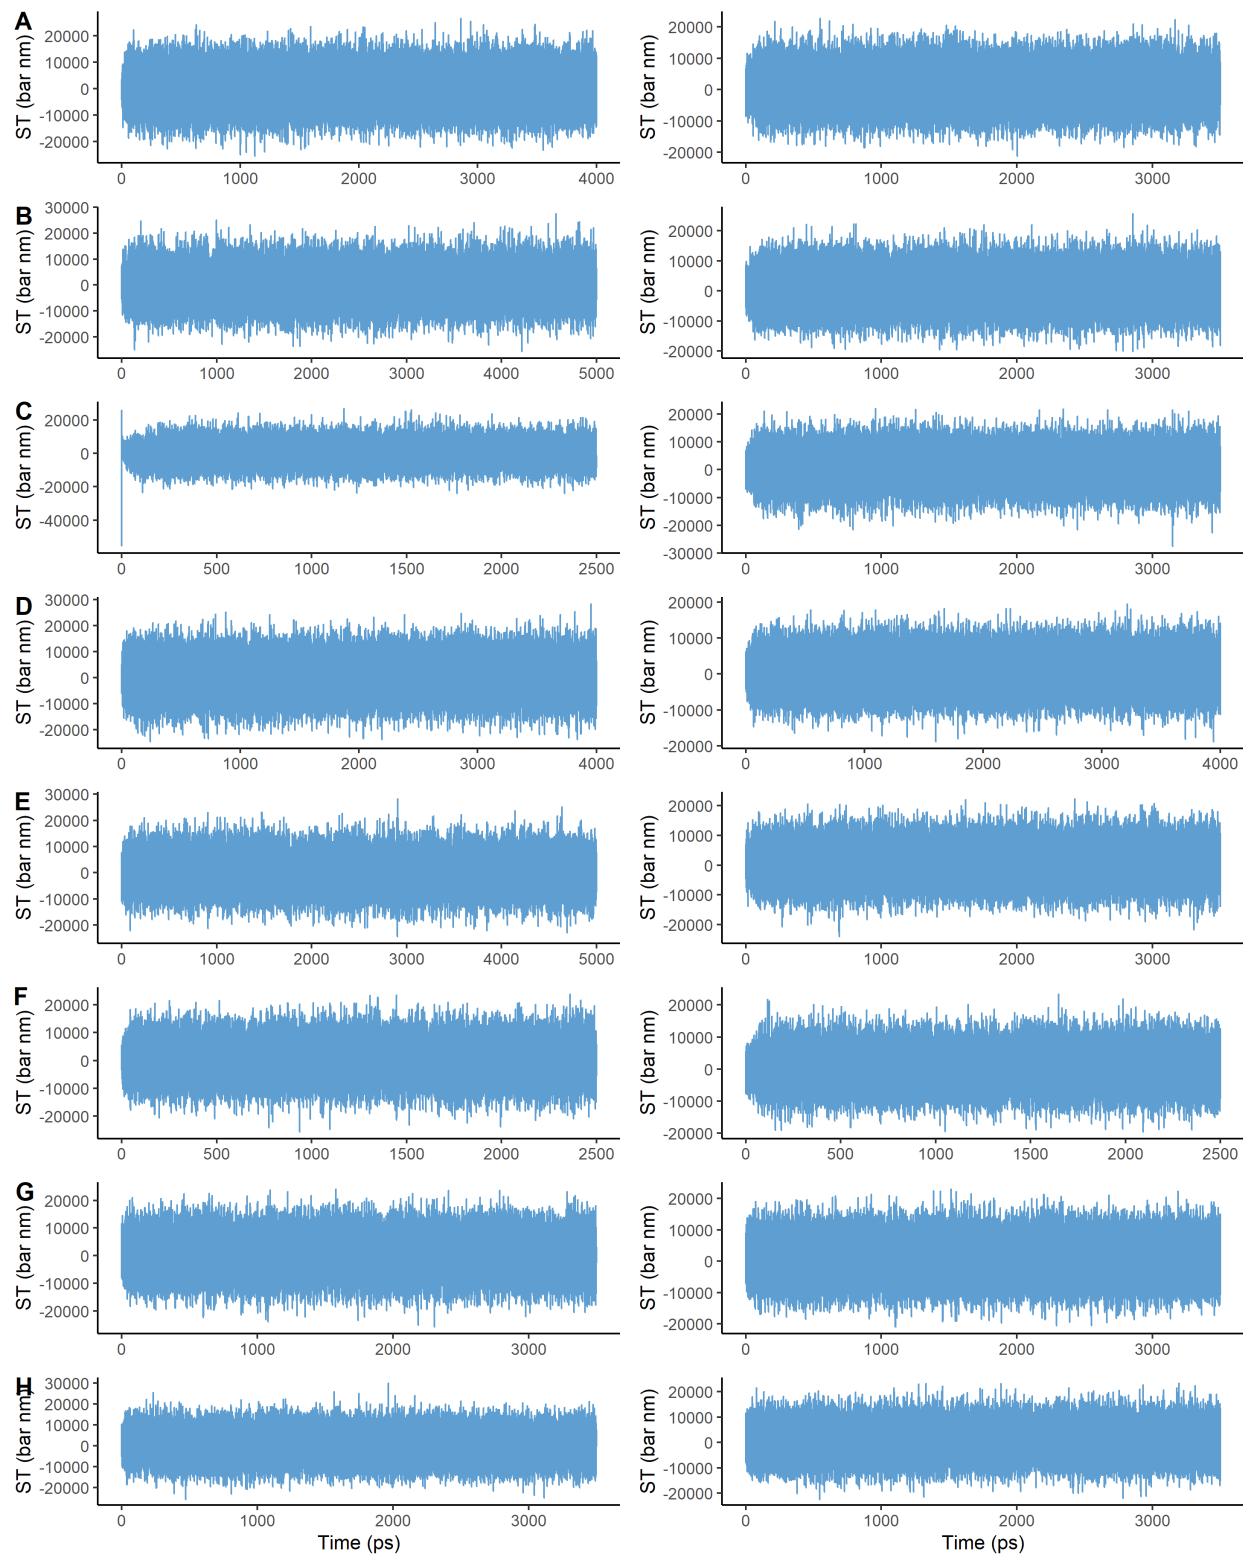

**Figure S2.** Plots of the surface tension of the biphasic system equilibrations of water and either octanol (left column) or hexane (right column) for the simulations of (A) ethylbenzene, (B) formamide, (C) acetonitrile, (D)  $\text{Gd}^{3+}$  ion, (E)  $\text{DEHP}^-$  ion, (F) Gd-DEHP 1:1, (G) Gd-DEHP 1:2, and (H) Gd-DEHP 1:3.

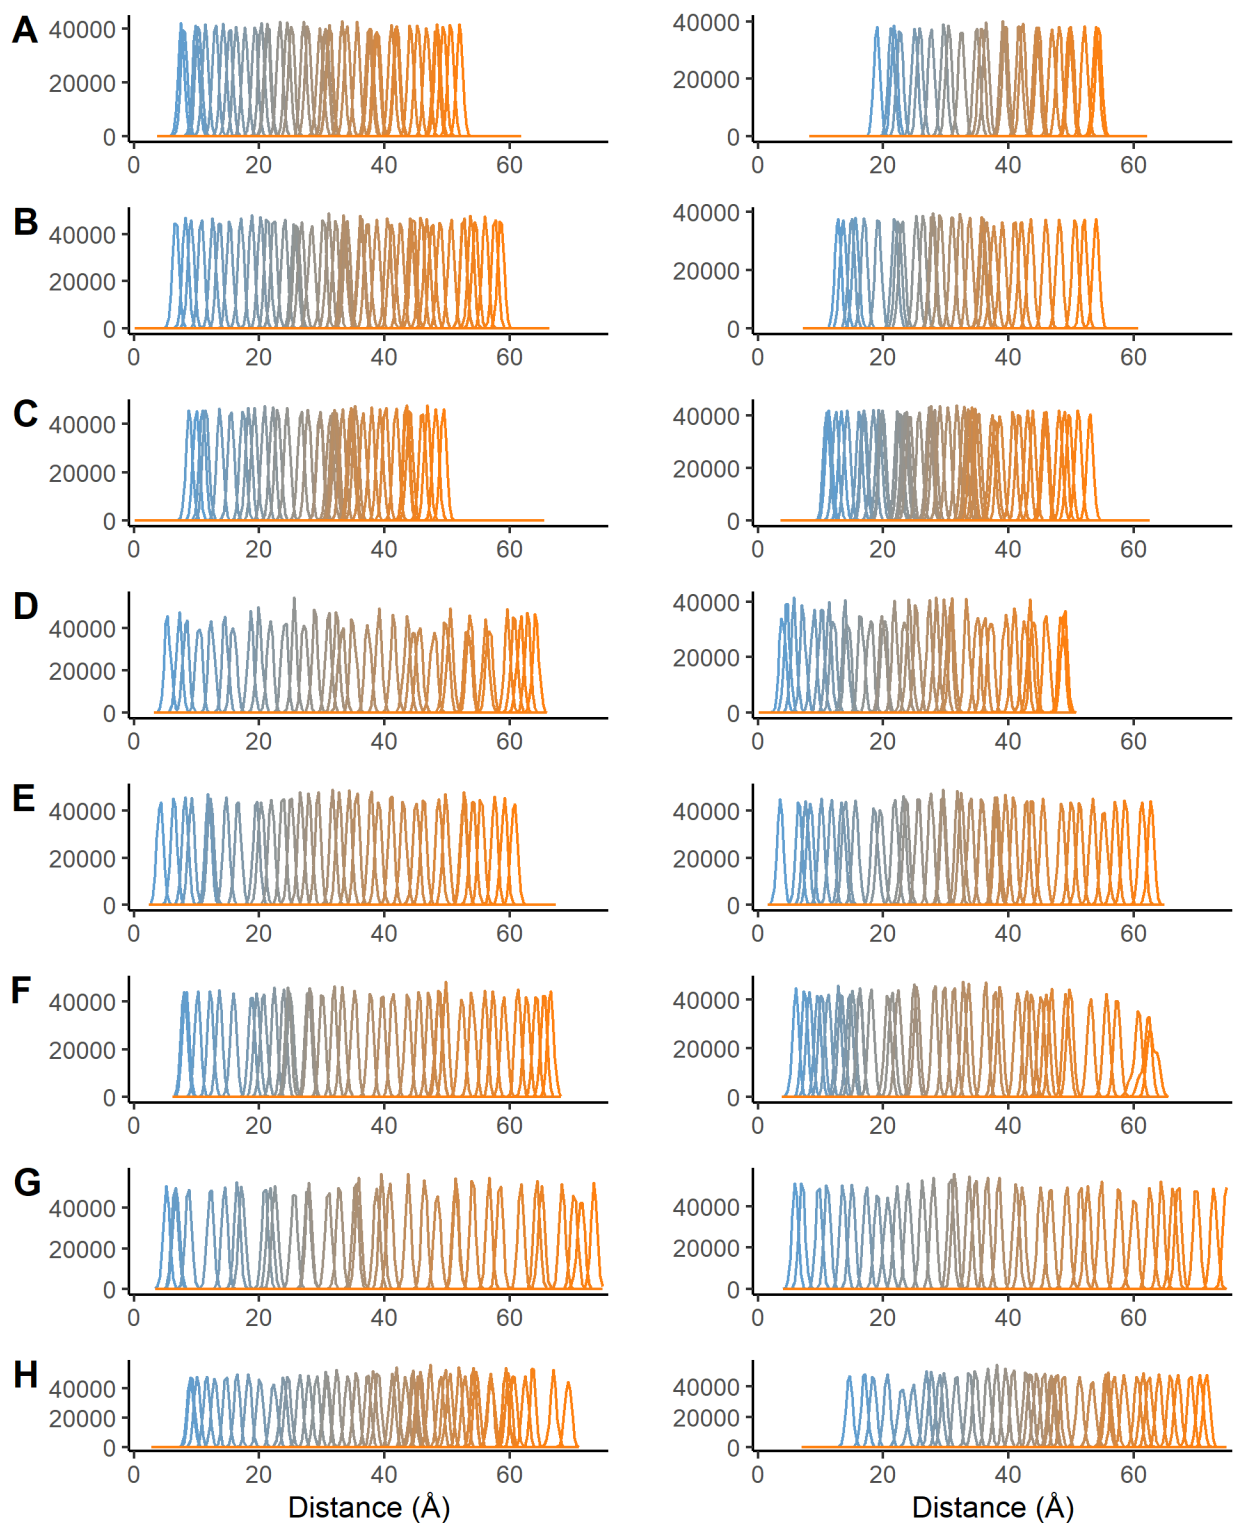

**Figure S3.** Umbrella sampling windows (Y-axis is sampling count) as the molecules transfer from water to either octanol (left column) or hexane (right column) for (A) ethylbenzene, (B) formamide, (C) acetonitrile, (D)  $\text{Gd}^{3+}$  ion, (E)  $\text{DEHP}^-$  ion, (F) Gd-DEHP 1:1, (G) Gd-DEHP 1:2, and (H) Gd-DEHP 1:3.

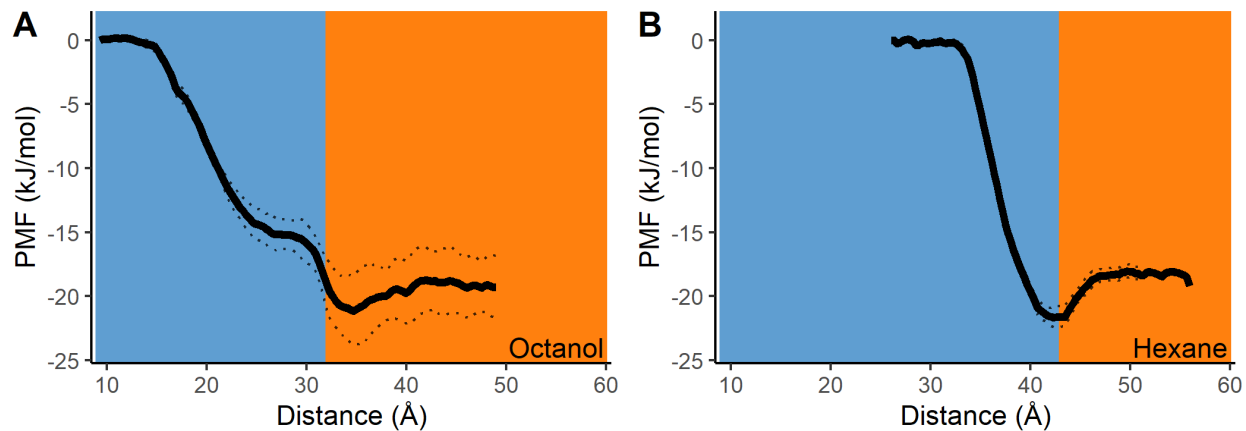

**Figure S4.** The potential of mean force as an ethylbenzene molecule transfers from bulk water into (A) octanol or (B) hexane. Background coloring indicates the transition from contact with bulk water (blue) to a mixture (light orange) and to bulk organic (dark orange). Dotted lines indicate statistical upper and lower bounds of the PMF.

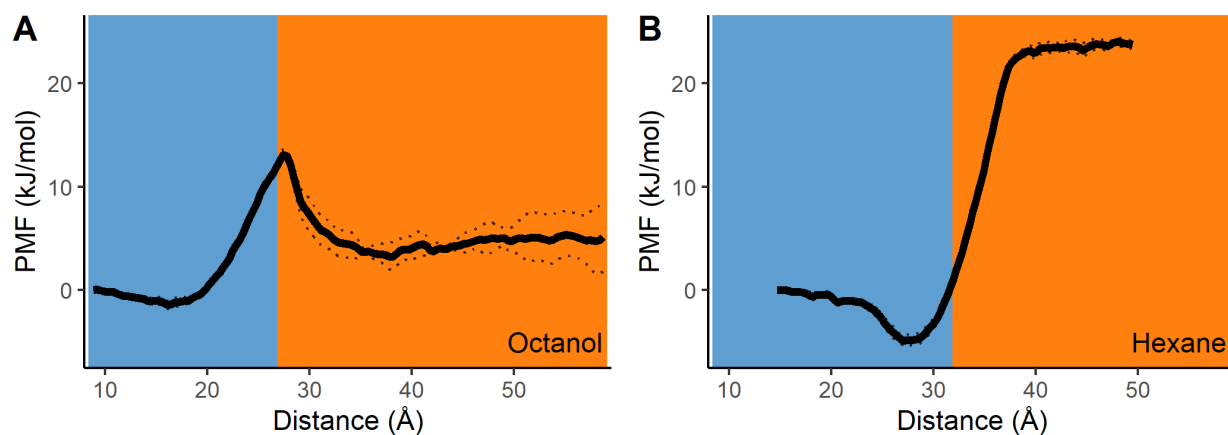

**Figure S5.** The potential of mean force as a formamide molecule transfers from bulk water into (A) octanol or (B) hexane. Background coloring is same as in Figure S1. Dotted lines indicate statistical upper and lower bounds of the PMF.

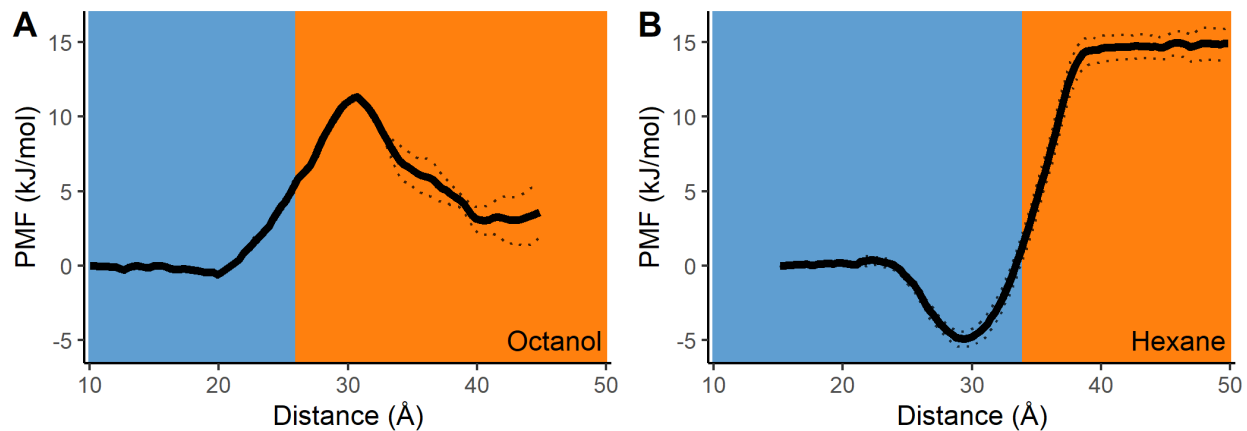

**Figure S6.** The potential of mean force as an acetonitrile molecule transfers from bulk water into (A) octanol or (B) hexane. Background coloring is same as in Figure S1. Dotted lines indicate statistical upper and lower bounds of the PMF.

## Supplementary information on the unbound $\text{Gd}^{3+}$ ion simulations

As the  $\text{Gd}^{3+}$  ion enters octanol (Figure S7A), the free energy rapidly increases monotonically with no plateauing observed over the length of the simulation. The absence of a plateau in the bulk octanol arises from the limited size of the simulation box and due to the formation of a water finger as the  $\text{Gd}^{3+}$  hydration complex brings along additional water molecules with it into the organic phase (Figure S7C). As the ion progressed deeper into the bulk octanol, the water finger continued extending and remained intact over the distance covered in this simulation. A water finger also formed when the ion enters the bulk hexane. However, as hexane lacks the hydrophilic head groups of octanol, the volume of the water entering the bulk hexane layer is much greater and thermodynamically more unfavorable (Figure S7B). The observation of water finger formations follows trends seen in previous studies on ion transfer from water into an immiscible liquid.\*

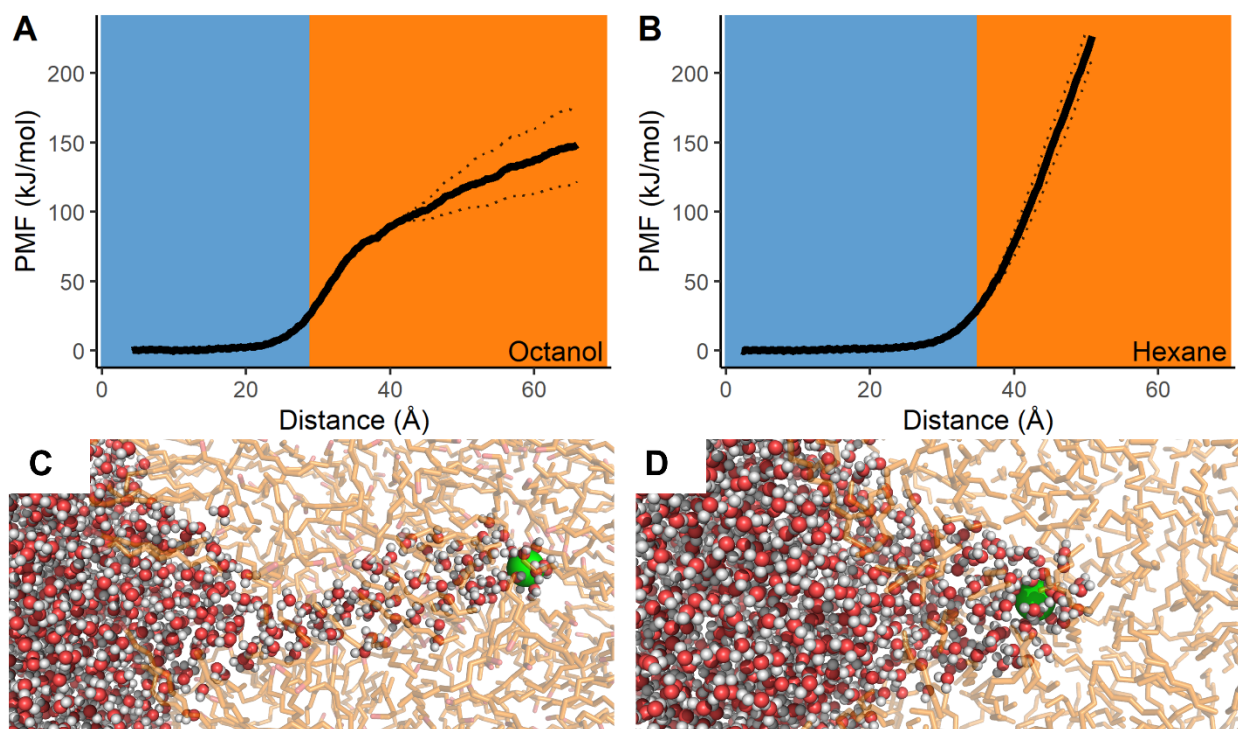

**Figure S7.** (A, B) Potential of mean force as a  $\text{Gd}^{3+}$  ion transfers from aqueous to either octanol or hexane layers. Dotted lines indicate statistical upper and lower bounds of the PMF. (C) Water tunnel formed as  $\text{Gd}^{3+}$  enters bulk octanol. (D) Water tunnel formed as  $\text{Gd}^{3+}$  enters bulk hexane. Coloring is same as Figure 1 with  $\text{Gd}^{3+}$  ion shown as a green sphere.

\* (1) Ilan Benjamin, *Science*, 1993, **261**, 1558–1560. (2) A. Morita, A. Koizumi and T. Hirano, *J. Chem. Phys.*, 2021, **154**, 080901. (3) N. Kikkawa, L. Wang and A. Morita, *J. Am. Chem. Soc.*, 2015, **137**, 8022–8025. (4) J. J. Karnes and I. Benjamin, *J. Chem. Phys.*, 2016, **145**, 014701.



## Supplementary information on the unrestrained DEHP<sup>-</sup> ion simulations

As additional verification that the DEHP<sup>-</sup> molecule does readily incorporate into the water-organic interfaces, we conducted additional simulations following the same methodology where an equilibrated system containing the DEHP<sup>-</sup> molecule positioned within either bulk aqueous or bulk organic layers was simulated for 25ns without any constraints. While the DEHP<sup>-</sup> molecule readily integrated into the interfacial layer when its starting position was within bulk water or within bulk hexane, it was not able to break past the ordered octanol tails at the octanol-water interface when it was within bulk octanol and so it remained in the octanol layer. This octanol-water simulation was extended to a total time of 200ns without and change; we anticipate that observation of this event without direction would require additional simulation time, but this is beyond the intended purpose of these simulations. The results of the simulations can be quantified by the radial distribution function of the DEHP<sup>-</sup> molecule to nearby solvent molecules (Figure S8). The graphs illustrate the frequent contact between ligand to both water and hexane in the water-hexane simulations as it resides at the interface (Figure S8A) and water and octanol when the ligand begins within bulk water (Figure S8B, right), but there is only frequent contact with octanol molecules when the ligand is initially positioned in the bulk octanol layer (Figure S8B, left).

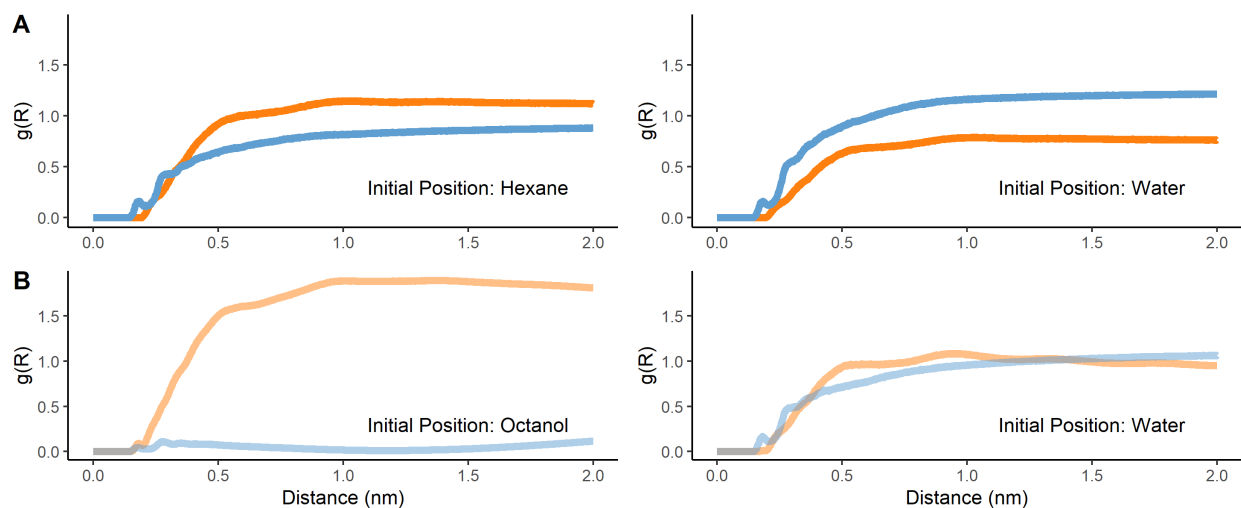

**Figure S8.** Radial distribution functions of the DEHP<sup>-</sup> molecule to nearby water (blue) or organic molecules (orange) for (A) the hexane-water and (B) octanol-water systems when the DEHP<sup>-</sup> molecule begins in bulk organic (left) or aqueous (right) phases.

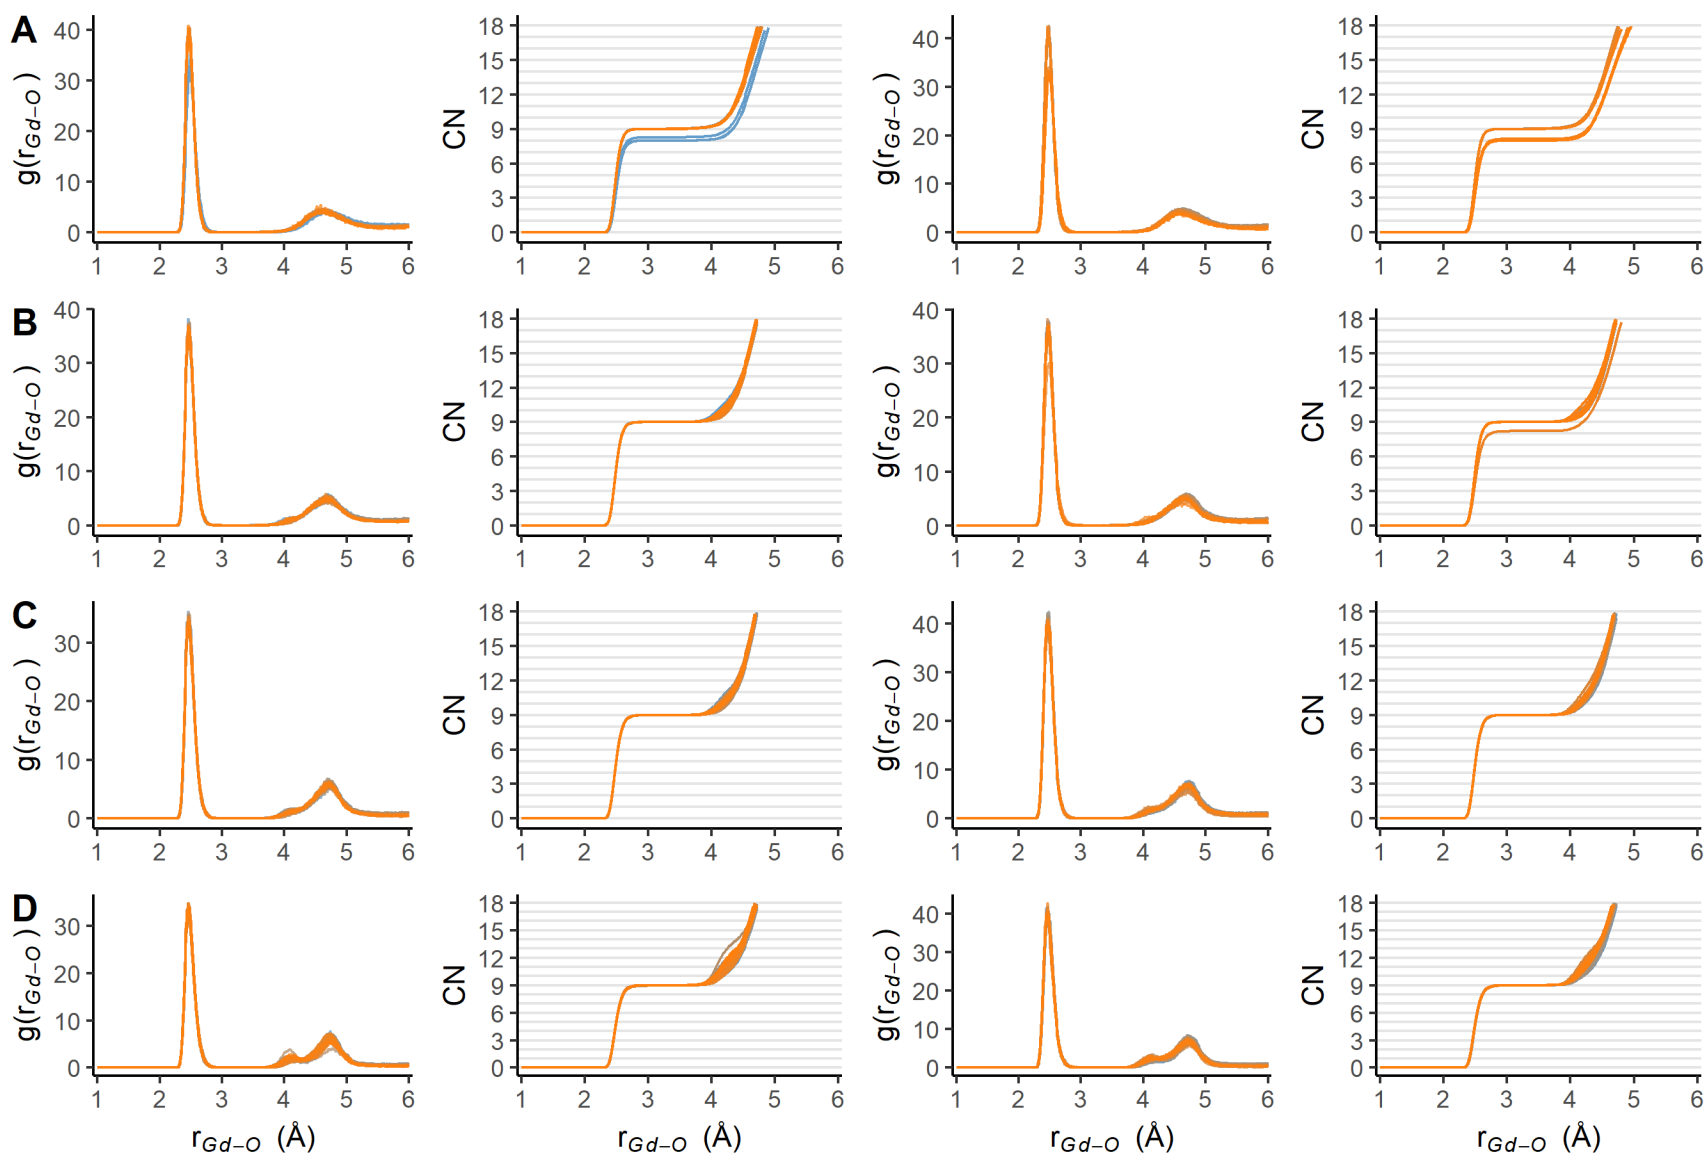

**Figure S9.** Plots of Gd-O radial distribution functions and coordination numbers (CN) from the umbrella simulations of the transfer of free Gd ion (A) and Gd-DEHP<sup>-</sup> in 1:1 (B), 1:2 (C) and 1:3 (D) ratios from water to octanol (left columns) or hexane (right)

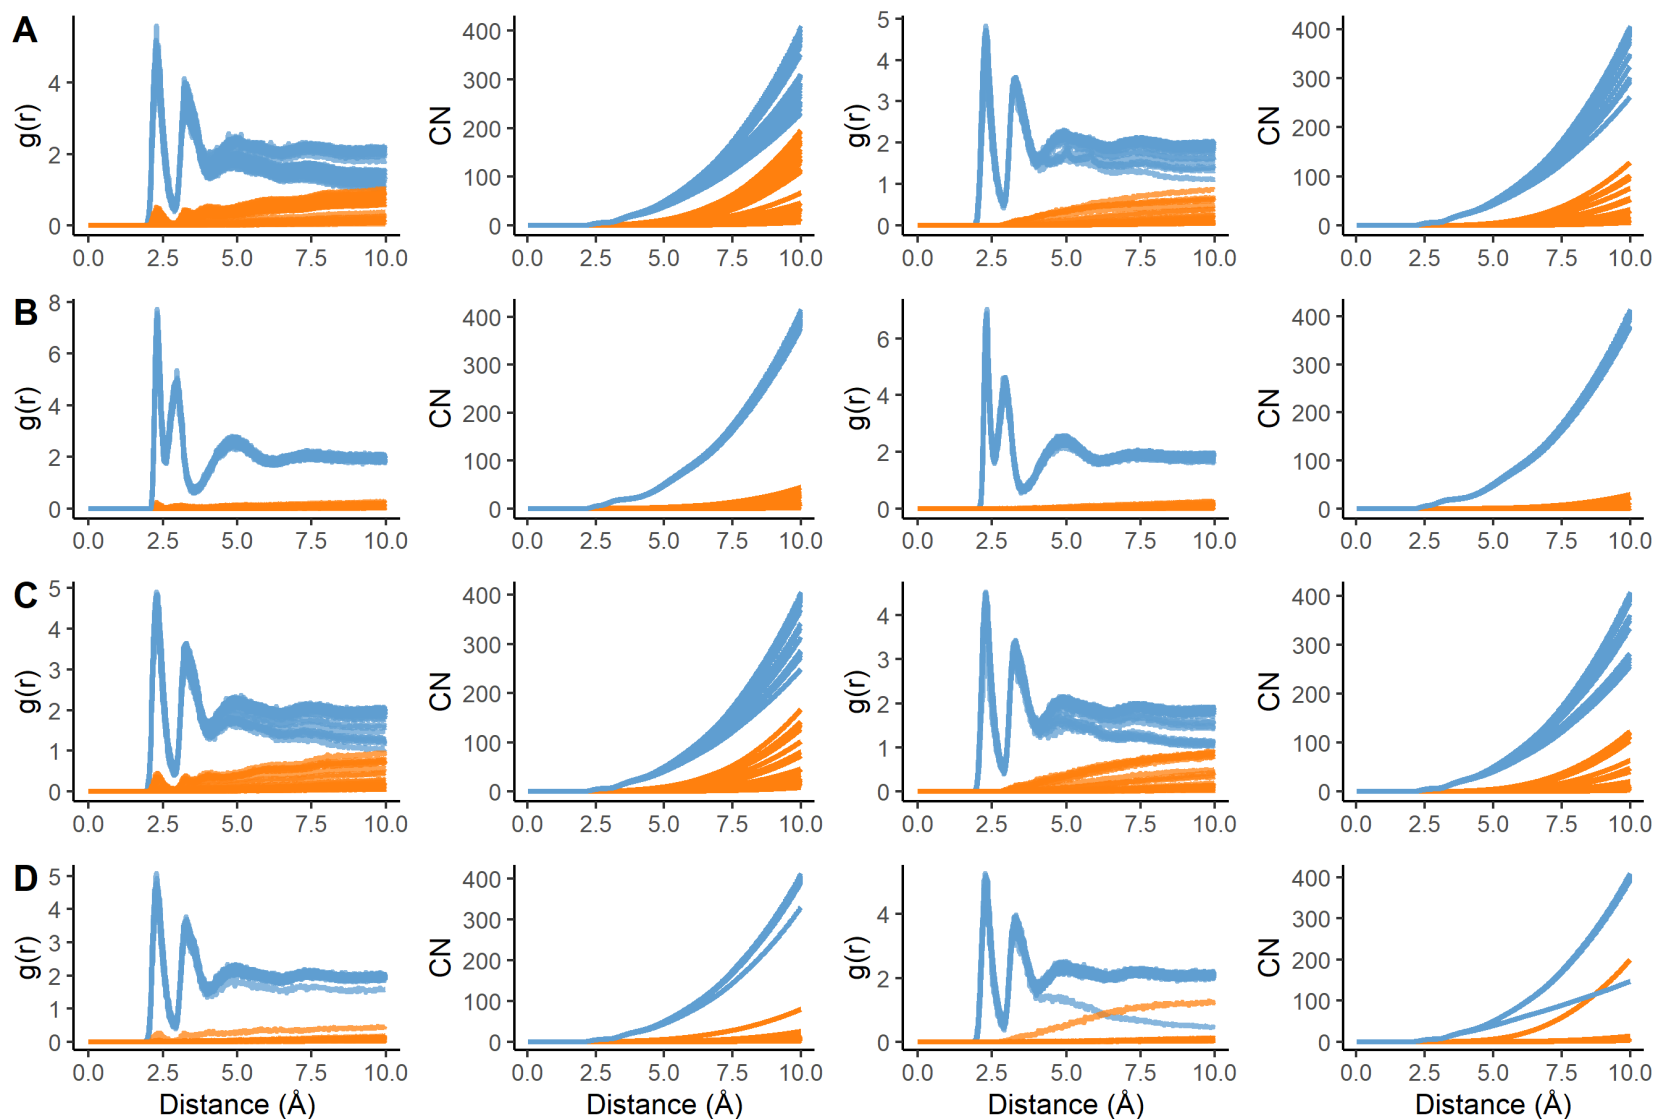

**Figure S10.** Radial distribution functions and coordination numbers (CN) for the counterions to the center of mass of water (blue) and organic (orange) molecules from the umbrella simulations of the transfer of free Gd ion (A), DEHP<sup>-</sup> ion (B), and Gd-DEHP<sup>-</sup> in 1:1 (C), and 1:2 (D) ratios with octanol (left columns) or hexane (right) as the organic solvent.

## DEHP structure in GROMACS format

Green Red Orange Magenta Azure Cyan Skyblue

55

|         |         |         |        |        |        |
|---------|---------|---------|--------|--------|--------|
| 1HDE    | O1      | 1       | 0.037  | 0.206  | -0.159 |
| 1HDE    | P1      | 2       | -0.071 | 0.195  | -0.264 |
| 1HDE    | O2      | 3       | -0.182 | 0.093  | -0.250 |
| 1HDE    | O3      | 4       | -0.002 | 0.181  | -0.414 |
| 1HDE    | O4      | 5       | -0.132 | 0.346  | -0.283 |
| 1HDE    | C1      | 6       | 0.054  | 0.054  | -0.451 |
| 1HDE    | H1      | 7       | 0.147  | 0.038  | -0.395 |
| 1HDE    | H2      | 8       | -0.015 | -0.026 | -0.423 |
| 1HDE    | C2      | 9       | -0.244 | 0.366  | -0.372 |
| 1HDE    | H3      | 10      | -0.218 | 0.327  | -0.471 |
| 1HDE    | H4      | 11      | -0.330 | 0.309  | -0.336 |
| 1HDE    | C3      | 12      | -0.278 | 0.515  | -0.377 |
| 1HDE    | C4      | 13      | -0.159 | 0.604  | -0.422 |
| 1HDE    | C5      | 14      | -0.411 | 0.539  | -0.454 |
| 1HDE    | H5      | 15      | -0.198 | 0.705  | -0.440 |
| 1HDE    | H6      | 16      | -0.091 | 0.613  | -0.336 |
| 1HDE    | C6      | 17      | -0.076 | 0.558  | -0.542 |
| 1HDE    | H7      | 18      | -0.437 | 0.645  | -0.443 |
| 1HDE    | H8      | 19      | -0.490 | 0.483  | -0.402 |
| 1HDE    | C7      | 20      | -0.415 | 0.502  | -0.603 |
| 1HDE    | H9      | 21      | -0.139 | 0.547  | -0.631 |
| 1HDE    | H10     | 22      | -0.032 | 0.460  | -0.522 |
| 1HDE    | C8      | 23      | 0.038  | 0.656  | -0.575 |
| 1HDE    | H11     | 24      | -0.517 | 0.516  | -0.642 |
| 1HDE    | H12     | 25      | -0.349 | 0.565  | -0.663 |
| 1HDE    | H13     | 26      | -0.388 | 0.398  | -0.621 |
| 1HDE    | H14     | 27      | 0.101  | 0.669  | -0.485 |
| 1HDE    | H15     | 28      | -0.004 | 0.755  | -0.597 |
| 1HDE    | C9      | 29      | 0.126  | 0.610  | -0.692 |
| 1HDE    | H16     | 30      | 0.067  | 0.600  | -0.784 |
| 1HDE    | H17     | 31      | 0.206  | 0.682  | -0.712 |
| 1HDE    | H18     | 32      | 0.172  | 0.513  | -0.671 |
| 1HDE    | C10     | 33      | 0.083  | 0.053  | -0.601 |
| 1HDE    | C11     | 34      | 0.168  | -0.070 | -0.641 |
| 1HDE    | C12     | 35      | -0.043 | 0.076  | -0.688 |
| 1HDE    | H19     | 36      | 0.199  | -0.057 | -0.746 |
| 1HDE    | H20     | 37      | 0.261  | -0.067 | -0.582 |
| 1HDE    | C13     | 38      | 0.106  | -0.210 | -0.625 |
| 1HDE    | H21     | 39      | -0.017 | 0.054  | -0.793 |
| 1HDE    | H22     | 40      | -0.066 | 0.184  | -0.686 |
| 1HDE    | C14     | 41      | -0.171 | 0.000  | -0.650 |
| 1HDE    | H23     | 42      | 0.020  | -0.221 | -0.693 |
| 1HDE    | H24     | 43      | 0.067  | -0.223 | -0.524 |
| 1HDE    | C15     | 44      | 0.206  | -0.322 | -0.655 |
| 1HDE    | H25     | 45      | -0.252 | 0.025  | -0.720 |
| 1HDE    | H26     | 46      | -0.158 | -0.108 | -0.652 |
| 1HDE    | H27     | 47      | -0.205 | 0.028  | -0.549 |
| 1HDE    | H28     | 48      | 0.292  | -0.313 | -0.587 |
| 1HDE    | H29     | 49      | 0.246  | -0.309 | -0.757 |
| 1HDE    | C16     | 50      | 0.146  | -0.463 | -0.642 |
| 1HDE    | H30     | 51      | 0.062  | -0.476 | -0.711 |
| 1HDE    | H31     | 52      | 0.220  | -0.540 | -0.664 |
| 1HDE    | H32     | 53      | 0.108  | -0.480 | -0.541 |
| 1HDE    | H33     | 54      | 0.148  | 0.140  | -0.620 |
| 1HDE    | H34     | 55      | -0.300 | 0.544  | -0.273 |
| 0.00000 | 0.00000 | 0.00000 |        |        |        |

## DEHP parameters

```
HDE 3
[ atoms ]
  1 opls_441  1 HDE O1      1 -0.867  15.999400
  2 opls_440  1 HDE P1      2  1.7108  30.973760
  3 opls_441  1 HDE O2      3 -0.867  15.999400
  4 opls_442  1 HDE O3      4 -0.8043  15.999400
  5 opls_442  1 HDE O4      5 -0.8043  15.999400
  6 opls_443  1 HDE C1      6  0.0546  12.011000
  7 opls_444  1 HDE H1      7  0.1623  1.008000
  8 opls_444  1 HDE H2      8  0.1623  1.008000
  9 opls_443  1 HDE C2      9  0.0546  12.011000
 10 opls_444  1 HDE H3     10  0.1623  1.008000
 11 opls_444  1 HDE H4     11  0.1623  1.008000
 12 opls_137  1 HDE C3     12 -0.1823  12.011000
 13 opls_136  1 HDE C4     13 -0.312  12.011000
 14 opls_136  1 HDE C5     14 -0.312  12.011000
 15 opls_140  1 HDE H5     15  0.1551  1.008000
 16 opls_140  1 HDE H6     16  0.1551  1.008000
 17 opls_136  1 HDE C6     17 -0.312  12.011000
 18 opls_140  1 HDE H7     18  0.1551  1.008000
 19 opls_140  1 HDE H8     19  0.1551  1.008000
 20 opls_135  1 HDE C7     20 -0.4965  12.011000
 21 opls_140  1 HDE H9     21  0.1551  1.008000
 22 opls_140  1 HDE H10    22  0.1551  1.008000
 23 opls_136  1 HDE C8     23 -0.312  12.011000
 24 opls_140  1 HDE H11    24  0.1591  1.008000
 25 opls_140  1 HDE H12    25  0.1591  1.008000
 26 opls_140  1 HDE H13    26  0.1591  1.008000
 27 opls_140  1 HDE H14    27  0.1551  1.008000
 28 opls_140  1 HDE H15    28  0.1551  1.008000
 29 opls_135  1 HDE C9     29 -0.4965  12.011000
 30 opls_140  1 HDE H16    30  0.1591  1.008000
 31 opls_140  1 HDE H17    31  0.1591  1.008000
 32 opls_140  1 HDE H18    32  0.1591  1.008000
 33 opls_137  1 HDE C10    33 -0.1823  12.011000
 34 opls_136  1 HDE C11    34 -0.312  12.011000
 35 opls_136  1 HDE C12    35 -0.312  12.011000
 36 opls_140  1 HDE H19    36  0.1551  1.008000
 37 opls_140  1 HDE H20    37  0.1551  1.008000
 38 opls_136  1 HDE C13    38 -0.312  12.011000
 39 opls_140  1 HDE H21    39  0.1551  1.008000
 40 opls_140  1 HDE H22    40  0.1551  1.008000
 41 opls_135  1 HDE C14    41 -0.4965  12.011000
 42 opls_140  1 HDE H23    42  0.1551  1.008000
 43 opls_140  1 HDE H24    43  0.1551  1.008000
 44 opls_136  1 HDE C15    44 -0.312  12.011000
 45 opls_140  1 HDE H25    45  0.1591  1.008000
 46 opls_140  1 HDE H26    46  0.1591  1.008000
 47 opls_140  1 HDE H27    47  0.1591  1.008000
 48 opls_140  1 HDE H28    48  0.1551  1.008000
 49 opls_140  1 HDE H29    49  0.1551  1.008000
 50 opls_135  1 HDE C16    50 -0.4965  12.011000
 51 opls_140  1 HDE H30    51  0.1591  1.008000
 52 opls_140  1 HDE H31    52  0.1591  1.008000
 53 opls_140  1 HDE H32    53  0.1591  1.008000
 54 opls_140  1 HDE H33    54  0.1646  1.008000
 55 opls_140  1 HDE H34    55  0.1646  1.008000
```

```
[ bonds ]
  1  2  1
  2  3  1
  2  4  1
  2  5  1
  4  6  1
  5  9  1
  6  7  1
  6  8  1
  6 33  1
```

|            |    |    |   |
|------------|----|----|---|
| 9          | 10 | 1  |   |
| 9          | 11 | 1  |   |
| 9          | 12 | 1  |   |
| 12         | 13 | 1  |   |
| 12         | 14 | 1  |   |
| 12         | 55 | 1  |   |
| 13         | 15 | 1  |   |
| 13         | 16 | 1  |   |
| 13         | 17 | 1  |   |
| 14         | 18 | 1  |   |
| 14         | 19 | 1  |   |
| 14         | 20 | 1  |   |
| 17         | 21 | 1  |   |
| 17         | 22 | 1  |   |
| 17         | 23 | 1  |   |
| 20         | 24 | 1  |   |
| 20         | 25 | 1  |   |
| 20         | 26 | 1  |   |
| 23         | 27 | 1  |   |
| 23         | 28 | 1  |   |
| 23         | 29 | 1  |   |
| 29         | 30 | 1  |   |
| 29         | 31 | 1  |   |
| 29         | 32 | 1  |   |
| 33         | 34 | 1  |   |
| 33         | 35 | 1  |   |
| 33         | 54 | 1  |   |
| 34         | 36 | 1  |   |
| 34         | 37 | 1  |   |
| 34         | 38 | 1  |   |
| 35         | 39 | 1  |   |
| 35         | 40 | 1  |   |
| 35         | 41 | 1  |   |
| 38         | 42 | 1  |   |
| 38         | 43 | 1  |   |
| 38         | 44 | 1  |   |
| 41         | 45 | 1  |   |
| 41         | 46 | 1  |   |
| 41         | 47 | 1  |   |
| 44         | 48 | 1  |   |
| 44         | 49 | 1  |   |
| 44         | 50 | 1  |   |
| 50         | 51 | 1  |   |
| 50         | 52 | 1  |   |
| 50         | 53 | 1  |   |
| [ angles ] |    |    |   |
| 1          | 2  | 3  | 1 |
| 1          | 2  | 4  | 1 |
| 1          | 2  | 5  | 1 |
| 3          | 2  | 4  | 1 |
| 3          | 2  | 5  | 1 |
| 4          | 2  | 5  | 1 |
| 2          | 4  | 6  | 1 |
| 2          | 5  | 9  | 1 |
| 4          | 6  | 7  | 1 |
| 4          | 6  | 8  | 1 |
| 4          | 6  | 33 | 1 |
| 7          | 6  | 8  | 1 |
| 7          | 6  | 33 | 1 |
| 8          | 6  | 33 | 1 |
| 5          | 9  | 10 | 1 |
| 5          | 9  | 11 | 1 |
| 5          | 9  | 12 | 1 |
| 10         | 9  | 11 | 1 |
| 10         | 9  | 12 | 1 |
| 11         | 9  | 12 | 1 |
| 9          | 12 | 13 | 1 |
| 9          | 12 | 14 | 1 |
| 9          | 12 | 55 | 1 |

|    |    |    |   |
|----|----|----|---|
| 13 | 12 | 14 | 1 |
| 13 | 12 | 55 | 1 |
| 14 | 12 | 55 | 1 |
| 12 | 13 | 15 | 1 |
| 12 | 13 | 16 | 1 |
| 12 | 13 | 17 | 1 |
| 15 | 13 | 16 | 1 |
| 15 | 13 | 17 | 1 |
| 16 | 13 | 17 | 1 |
| 12 | 14 | 18 | 1 |
| 12 | 14 | 19 | 1 |
| 12 | 14 | 20 | 1 |
| 18 | 14 | 19 | 1 |
| 18 | 14 | 20 | 1 |
| 19 | 14 | 20 | 1 |
| 13 | 17 | 21 | 1 |
| 13 | 17 | 22 | 1 |
| 13 | 17 | 23 | 1 |
| 21 | 17 | 22 | 1 |
| 21 | 17 | 23 | 1 |
| 22 | 17 | 23 | 1 |
| 14 | 20 | 24 | 1 |
| 14 | 20 | 25 | 1 |
| 14 | 20 | 26 | 1 |
| 24 | 20 | 25 | 1 |
| 24 | 20 | 26 | 1 |
| 25 | 20 | 26 | 1 |
| 17 | 23 | 27 | 1 |
| 17 | 23 | 28 | 1 |
| 17 | 23 | 29 | 1 |
| 27 | 23 | 28 | 1 |
| 27 | 23 | 29 | 1 |
| 28 | 23 | 29 | 1 |
| 23 | 29 | 30 | 1 |
| 23 | 29 | 31 | 1 |
| 23 | 29 | 32 | 1 |
| 30 | 29 | 31 | 1 |
| 30 | 29 | 32 | 1 |
| 31 | 29 | 32 | 1 |
| 6  | 33 | 34 | 1 |
| 6  | 33 | 35 | 1 |
| 6  | 33 | 54 | 1 |
| 34 | 33 | 35 | 1 |
| 34 | 33 | 54 | 1 |
| 35 | 33 | 54 | 1 |
| 33 | 34 | 36 | 1 |
| 33 | 34 | 37 | 1 |
| 33 | 34 | 38 | 1 |
| 36 | 34 | 37 | 1 |
| 36 | 34 | 38 | 1 |
| 37 | 34 | 38 | 1 |
| 33 | 35 | 39 | 1 |
| 33 | 35 | 40 | 1 |
| 33 | 35 | 41 | 1 |
| 39 | 35 | 40 | 1 |
| 39 | 35 | 41 | 1 |
| 40 | 35 | 41 | 1 |
| 34 | 38 | 42 | 1 |
| 34 | 38 | 43 | 1 |
| 34 | 38 | 44 | 1 |
| 42 | 38 | 43 | 1 |
| 42 | 38 | 44 | 1 |
| 43 | 38 | 44 | 1 |
| 35 | 41 | 45 | 1 |
| 35 | 41 | 46 | 1 |
| 35 | 41 | 47 | 1 |
| 45 | 41 | 46 | 1 |
| 45 | 41 | 47 | 1 |
| 46 | 41 | 47 | 1 |

|               |    |    |    |   |
|---------------|----|----|----|---|
| 38            | 44 | 48 | 1  |   |
| 38            | 44 | 49 | 1  |   |
| 38            | 44 | 50 | 1  |   |
| 48            | 44 | 49 | 1  |   |
| 48            | 44 | 50 | 1  |   |
| 49            | 44 | 50 | 1  |   |
| 44            | 50 | 51 | 1  |   |
| 44            | 50 | 52 | 1  |   |
| 44            | 50 | 53 | 1  |   |
| 51            | 50 | 52 | 1  |   |
| 51            | 50 | 53 | 1  |   |
| 52            | 50 | 53 | 1  |   |
| [ dihedrals ] |    |    |    |   |
| 1             | 2  | 4  | 6  | 3 |
| 3             | 2  | 4  | 6  | 3 |
| 5             | 2  | 4  | 6  | 3 |
| 1             | 2  | 5  | 9  | 3 |
| 3             | 2  | 5  | 9  | 3 |
| 4             | 2  | 5  | 9  | 3 |
| 2             | 4  | 6  | 7  | 3 |
| 2             | 4  | 6  | 8  | 3 |
| 2             | 4  | 6  | 33 | 3 |
| 2             | 5  | 9  | 10 | 3 |
| 2             | 5  | 9  | 11 | 3 |
| 2             | 5  | 9  | 12 | 3 |
| 4             | 6  | 33 | 34 | 3 |
| 4             | 6  | 33 | 35 | 3 |
| 4             | 6  | 33 | 54 | 3 |
| 7             | 6  | 33 | 34 | 3 |
| 7             | 6  | 33 | 35 | 3 |
| 7             | 6  | 33 | 54 | 3 |
| 8             | 6  | 33 | 34 | 3 |
| 8             | 6  | 33 | 35 | 3 |
| 8             | 6  | 33 | 54 | 3 |
| 5             | 9  | 12 | 13 | 3 |
| 5             | 9  | 12 | 14 | 3 |
| 5             | 9  | 12 | 55 | 3 |
| 10            | 9  | 12 | 13 | 3 |
| 10            | 9  | 12 | 14 | 3 |
| 10            | 9  | 12 | 55 | 3 |
| 11            | 9  | 12 | 13 | 3 |
| 11            | 9  | 12 | 14 | 3 |
| 11            | 9  | 12 | 55 | 3 |
| 9             | 12 | 13 | 15 | 3 |
| 9             | 12 | 13 | 16 | 3 |
| 9             | 12 | 13 | 17 | 3 |
| 14            | 12 | 13 | 15 | 3 |
| 14            | 12 | 13 | 16 | 3 |
| 14            | 12 | 13 | 17 | 3 |
| 55            | 12 | 13 | 15 | 3 |
| 55            | 12 | 13 | 16 | 3 |
| 55            | 12 | 13 | 17 | 3 |
| 9             | 12 | 14 | 18 | 3 |
| 9             | 12 | 14 | 19 | 3 |
| 9             | 12 | 14 | 20 | 3 |
| 13            | 12 | 14 | 18 | 3 |
| 13            | 12 | 14 | 19 | 3 |
| 13            | 12 | 14 | 20 | 3 |
| 55            | 12 | 14 | 18 | 3 |
| 55            | 12 | 14 | 19 | 3 |
| 55            | 12 | 14 | 20 | 3 |
| 12            | 13 | 17 | 21 | 3 |
| 12            | 13 | 17 | 22 | 3 |
| 12            | 13 | 17 | 23 | 3 |
| 15            | 13 | 17 | 21 | 3 |
| 15            | 13 | 17 | 22 | 3 |
| 15            | 13 | 17 | 23 | 3 |
| 16            | 13 | 17 | 21 | 3 |
| 16            | 13 | 17 | 22 | 3 |



|    |    |    |    |   |
|----|----|----|----|---|
| 16 | 13 | 17 | 23 | 3 |
| 12 | 14 | 20 | 24 | 3 |
| 12 | 14 | 20 | 25 | 3 |
| 12 | 14 | 20 | 26 | 3 |
| 18 | 14 | 20 | 24 | 3 |
| 18 | 14 | 20 | 25 | 3 |
| 18 | 14 | 20 | 26 | 3 |
| 19 | 14 | 20 | 24 | 3 |
| 19 | 14 | 20 | 25 | 3 |
| 19 | 14 | 20 | 26 | 3 |
| 13 | 17 | 23 | 27 | 3 |
| 13 | 17 | 23 | 28 | 3 |
| 13 | 17 | 23 | 29 | 3 |
| 21 | 17 | 23 | 27 | 3 |
| 21 | 17 | 23 | 28 | 3 |
| 21 | 17 | 23 | 29 | 3 |
| 22 | 17 | 23 | 27 | 3 |
| 22 | 17 | 23 | 28 | 3 |
| 22 | 17 | 23 | 29 | 3 |
| 17 | 23 | 29 | 30 | 3 |
| 17 | 23 | 29 | 31 | 3 |
| 17 | 23 | 29 | 32 | 3 |
| 27 | 23 | 29 | 30 | 3 |
| 27 | 23 | 29 | 31 | 3 |
| 27 | 23 | 29 | 32 | 3 |
| 28 | 23 | 29 | 30 | 3 |
| 28 | 23 | 29 | 31 | 3 |
| 28 | 23 | 29 | 32 | 3 |
| 6  | 33 | 34 | 36 | 3 |
| 6  | 33 | 34 | 37 | 3 |
| 6  | 33 | 34 | 38 | 3 |
| 35 | 33 | 34 | 36 | 3 |
| 35 | 33 | 34 | 37 | 3 |
| 35 | 33 | 34 | 38 | 3 |
| 54 | 33 | 34 | 36 | 3 |
| 54 | 33 | 34 | 37 | 3 |
| 54 | 33 | 34 | 38 | 3 |
| 6  | 33 | 35 | 39 | 3 |
| 6  | 33 | 35 | 40 | 3 |
| 6  | 33 | 35 | 41 | 3 |
| 34 | 33 | 35 | 39 | 3 |
| 34 | 33 | 35 | 40 | 3 |
| 34 | 33 | 35 | 41 | 3 |
| 54 | 33 | 35 | 39 | 3 |
| 54 | 33 | 35 | 40 | 3 |
| 54 | 33 | 35 | 41 | 3 |
| 33 | 34 | 38 | 42 | 3 |
| 33 | 34 | 38 | 43 | 3 |
| 33 | 34 | 38 | 44 | 3 |
| 36 | 34 | 38 | 42 | 3 |
| 36 | 34 | 38 | 43 | 3 |
| 36 | 34 | 38 | 44 | 3 |
| 37 | 34 | 38 | 42 | 3 |
| 37 | 34 | 38 | 43 | 3 |
| 37 | 34 | 38 | 44 | 3 |
| 33 | 35 | 41 | 45 | 3 |
| 33 | 35 | 41 | 46 | 3 |
| 33 | 35 | 41 | 47 | 3 |
| 39 | 35 | 41 | 45 | 3 |
| 39 | 35 | 41 | 46 | 3 |
| 39 | 35 | 41 | 47 | 3 |
| 40 | 35 | 41 | 45 | 3 |
| 40 | 35 | 41 | 46 | 3 |
| 40 | 35 | 41 | 47 | 3 |
| 34 | 38 | 44 | 48 | 3 |
| 34 | 38 | 44 | 49 | 3 |
| 34 | 38 | 44 | 50 | 3 |
| 42 | 38 | 44 | 48 | 3 |
| 42 | 38 | 44 | 49 | 3 |

|    |    |    |    |   |
|----|----|----|----|---|
| 42 | 38 | 44 | 50 | 3 |
| 43 | 38 | 44 | 48 | 3 |
| 43 | 38 | 44 | 49 | 3 |
| 43 | 38 | 44 | 50 | 3 |
| 38 | 44 | 50 | 51 | 3 |
| 38 | 44 | 50 | 52 | 3 |
| 38 | 44 | 50 | 53 | 3 |
| 48 | 44 | 50 | 51 | 3 |
| 48 | 44 | 50 | 52 | 3 |
| 48 | 44 | 50 | 53 | 3 |
| 49 | 44 | 50 | 51 | 3 |
| 49 | 44 | 50 | 52 | 3 |
| 49 | 44 | 50 | 53 | 3 |

[ pairs ]

|    |    |
|----|----|
| 1  | 6  |
| 1  | 9  |
| 2  | 7  |
| 2  | 8  |
| 2  | 10 |
| 2  | 11 |
| 2  | 12 |
| 2  | 33 |
| 3  | 6  |
| 3  | 9  |
| 4  | 9  |
| 4  | 34 |
| 4  | 35 |
| 4  | 54 |
| 5  | 6  |
| 5  | 13 |
| 5  | 14 |
| 5  | 55 |
| 6  | 36 |
| 6  | 37 |
| 6  | 38 |
| 6  | 39 |
| 6  | 40 |
| 6  | 41 |
| 7  | 34 |
| 7  | 35 |
| 7  | 54 |
| 8  | 34 |
| 8  | 35 |
| 8  | 54 |
| 9  | 15 |
| 9  | 16 |
| 9  | 17 |
| 9  | 18 |
| 9  | 19 |
| 9  | 20 |
| 10 | 13 |
| 10 | 14 |
| 10 | 55 |
| 11 | 13 |
| 11 | 14 |
| 11 | 55 |
| 12 | 21 |
| 12 | 22 |
| 12 | 23 |
| 12 | 24 |
| 12 | 25 |
| 12 | 26 |
| 13 | 18 |
| 13 | 19 |
| 13 | 20 |
| 13 | 27 |
| 13 | 28 |
| 13 | 29 |
| 14 | 15 |

14 16  
14 17  
15 21  
15 22  
15 23  
15 55  
16 21  
16 22  
16 23  
16 55  
17 30  
17 31  
17 32  
17 55  
18 24  
18 25  
18 26  
18 55  
19 24  
19 25  
19 26  
19 55  
20 55  
21 27  
21 28  
21 29  
22 27  
22 28  
22 29  
27 30  
27 31  
27 32  
28 30  
28 31  
28 32  
33 42  
33 43  
33 44  
33 45  
33 46  
33 47  
34 39  
34 40  
34 41  
34 48  
34 49  
34 50  
35 36  
35 37  
35 38  
36 42  
36 43  
36 44  
36 54  
37 42  
37 43  
37 44  
37 54  
38 51  
38 52  
38 53  
38 54  
39 45  
39 46  
39 47  
39 54  
40 45  
40 46  
40 47

40 54  
41 54  
42 48  
42 49  
42 50  
43 48  
43 49  
43 50  
48 51  
48 52  
48 53  
49 51  
49 52  
49 53
